# Supplementary material for: Representation of the terrestrial carbon cycle in CMIP6
Source: Copernicus journal article supplement (doi:10.5194/bg-21-5321-2024), 2024-11-28
Supplement: Supplementary file 1 [file bg-21-5321-2024-supplement.pdf]

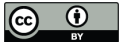

*Supplement of*

## **Representation of the terrestrial carbon cycle in CMIP6**

**Bettina K. Gier et al.**

*Correspondence to:* Bettina K. Gier ([gier@uni-bremen.de](mailto:gier@uni-bremen.de))

The copyright of individual parts of the supplement might differ from the article licence.

# S1 Tables for Data from Scatterplots

Table S1: LAI Mean for 1986-2005 [1]

| Model                 | Global      | NH          | SH          | Tropics     |
|-----------------------|-------------|-------------|-------------|-------------|
| BNU-ESM CMIP5e        | 3.64 ± 0.08 | 2.13 ± 0.06 | 5.04 ± 0.1  | 6.37 ± 0.1  |
| BNU-ESM CMIP5c        | 3.75 ± 0.06 | 2.4 ± 0.09  | 4.98 ± 0.04 | 6.34 ± 0.06 |
| CESM1-BGC CMIP5e      | 2.68 ± 0.06 | 2.03 ± 0.06 | 3.31 ± 0.09 | 3.78 ± 0.1  |
| CESM1-BGC CMIP5c      | 2.64 ± 0.04 | 1.99 ± 0.05 | 3.27 ± 0.05 | 3.72 ± 0.05 |
| CanESM2 CMIP5e        | 1.71 ± 0.06 | 1.11 ± 0.02 | 2.26 ± 0.11 | 2.65 ± 0.13 |
| CanESM2 CMIP5c        | 1.72 ± 0.04 | 1.13 ± 0.02 | 2.26 ± 0.08 | 2.65 ± 0.1  |
| FIO-ESM CMIP5e        | 2.23 ± 0.01 | 1.69 ± 0.01 | 2.73 ± 0.0  | 3.14 ± 0.0  |
| GFDL-ESM2G CMIP5e     | 3.1 ± 0.06  | 2.65 ± 0.02 | 3.48 ± 0.1  | 4.09 ± 0.1  |
| GFDL-ESM2G CMIP5c     | 3.02 ± 0.04 | 2.62 ± 0.05 | 3.35 ± 0.06 | 3.96 ± 0.05 |
| GFDL-ESM2M CMIP5e     | 3.17 ± 0.05 | 2.88 ± 0.02 | 3.4 ± 0.1   | 4.05 ± 0.11 |
| GFDL-ESM2M CMIP5c     | 3.05 ± 0.07 | 2.72 ± 0.04 | 3.31 ± 0.12 | 3.9 ± 0.12  |
| HadGEM2-CC CMIP5c     | 2.48 ± 0.02 | 1.52 ± 0.03 | 3.38 ± 0.02 | 4.15 ± 0.02 |
| HadGEM2-ES CMIP5c     | 2.57 ± 0.03 | 1.6 ± 0.03  | 3.48 ± 0.04 | 4.28 ± 0.04 |
| IPSL-CM5A-LR CMIP5c   | 2.18 ± 0.03 | 2.05 ± 0.02 | 2.28 ± 0.06 | 2.84 ± 0.07 |
| IPSL-CM5A-MR CMIP5c   | 2.13 ± 0.03 | 2.04 ± 0.03 | 2.2 ± 0.04  | 2.7 ± 0.05  |
| IPSL-CM5B-LR CMIP5c   | 2.0 ± 0.02  | 1.93 ± 0.03 | 2.04 ± 0.05 | 2.43 ± 0.07 |
| MIROC-ESM-CHEM CMIP5c | 2.66 ± 0.03 | 2.0 ± 0.02  | 3.25 ± 0.06 | 3.56 ± 0.07 |
| MIROC-ESM CMIP5e      | 2.66 ± 0.05 | 2.05 ± 0.03 | 3.2 ± 0.08  | 3.48 ± 0.09 |
| MIROC-ESM CMIP5c      | 2.65 ± 0.03 | 2.06 ± 0.02 | 3.16 ± 0.05 | 3.45 ± 0.05 |
| MPI-ESM-LR CMIP5e     | 2.27 ± 0.02 | 1.59 ± 0.02 | 2.92 ± 0.04 | 3.32 ± 0.04 |
| MPI-ESM-LR CMIP5c     | 2.26 ± 0.03 | 1.59 ± 0.01 | 2.89 ± 0.07 | 3.29 ± 0.07 |
| MPI-ESM-MR CMIP5c     | 2.3 ± 0.02  | 1.64 ± 0.02 | 2.93 ± 0.04 | 3.32 ± 0.05 |
| MRI-ESM1 CMIP5e       | 3.61 ± 0.07 | 2.16 ± 0.06 | 4.95 ± 0.1  | 5.98 ± 0.13 |
| NorESM1-ME CMIP5e     | 2.8 ± 0.05  | 2.16 ± 0.07 | 3.41 ± 0.07 | 3.85 ± 0.08 |
| NorESM1-ME CMIP5c     | 2.8 ± 0.05  | 2.12 ± 0.07 | 3.43 ± 0.06 | 3.87 ± 0.06 |
| inmcm4 CMIP5c         | 1.62 ± 0.02 | 1.26 ± 0.02 | 1.95 ± 0.03 | 2.27 ± 0.03 |
| ACCESS-ESM1-5 CMIP6e  | 1.64 ± 0.02 | 1.43 ± 0.03 | 1.82 ± 0.03 | 2.09 ± 0.04 |
| ACCESS-ESM1-5 CMIP6c  | 1.65 ± 0.02 | 1.46 ± 0.02 | 1.82 ± 0.05 | 2.07 ± 0.06 |
| CESM2-WACCM CMIP6c    | 1.78 ± 0.04 | 1.49 ± 0.05 | 2.02 ± 0.03 | 2.35 ± 0.04 |
| CESM2 CMIP6c          | 1.79 ± 0.05 | 1.53 ± 0.06 | 2.0 ± 0.04  | 2.33 ± 0.06 |
| CMCC-CM2-SR5 CMIP6c   | 2.17 ± 0.06 | 2.33 ± 0.07 | 1.98 ± 0.08 | 2.18 ± 0.07 |
| CMCC-ESM2 CMIP6c      | 2.2 ± 0.05  | 2.3 ± 0.06  | 2.06 ± 0.07 | 2.28 ± 0.06 |
| CNRM-ESM2-1 CMIP6e    | 1.59 ± 0.03 | 1.33 ± 0.03 | 1.82 ± 0.05 | 2.13 ± 0.04 |
| CNRM-ESM2-1 CMIP6c    | 1.59 ± 0.03 | 1.34 ± 0.05 | 1.81 ± 0.04 | 2.12 ± 0.03 |
| CanESM5-CanOE CMIP6e  | 1.71 ± 0.04 | 1.14 ± 0.03 | 2.24 ± 0.06 | 2.64 ± 0.07 |
| CanESM5-CanOE CMIP6c  | 1.69 ± 0.04 | 1.15 ± 0.03 | 2.2 ± 0.07  | 2.58 ± 0.08 |
| CanESM5 CMIP6e        | 1.71 ± 0.04 | 1.16 ± 0.03 | 2.22 ± 0.06 | 2.61 ± 0.06 |
| CanESM5 CMIP6c        | 1.72 ± 0.02 | 1.18 ± 0.03 | 2.22 ± 0.03 | 2.6 ± 0.03  |
| EC-Earth3-CC CMIP6e   | 2.59 ± 0.06 | 1.6 ± 0.06  | 3.53 ± 0.08 | 3.93 ± 0.08 |
| EC-Earth3-CC CMIP6c   | 2.54 ± 0.05 | 1.58 ± 0.05 | 3.45 ± 0.09 | 3.82 ± 0.07 |
| EC-Earth3-Veg CMIP6c  | 2.55 ± 0.04 | 1.57 ± 0.06 | 3.47 ± 0.05 | 3.87 ± 0.04 |

Continued on next page

Table S1: LAI Mean for 1986-2005 [1]

| Model                 | Global      | NH          | SH          | Tropics     |
|-----------------------|-------------|-------------|-------------|-------------|
| GFDL-ESM4 CMIP6e      | 2.33 ± 0.04 | 2.0 ± 0.03  | 2.61 ± 0.06 | 3.17 ± 0.08 |
| GFDL-ESM4 CMIP6c      | 2.27 ± 0.04 | 1.92 ± 0.03 | 2.58 ± 0.09 | 3.13 ± 0.09 |
| INM-CM4-8 CMIP6c      | 1.86 ± 0.02 | 1.5 ± 0.02  | 2.18 ± 0.02 | 2.53 ± 0.02 |
| INM-CM5-0 CMIP6c      | 1.85 ± 0.02 | 1.48 ± 0.03 | 2.18 ± 0.02 | 2.53 ± 0.01 |
| IPSL-CM6A-LR CMIP6c   | 1.85 ± 0.04 | 1.16 ± 0.04 | 2.49 ± 0.05 | 2.97 ± 0.06 |
| MIROC-ES2L CMIP6e     | 1.55 ± 0.01 | 1.01 ± 0.02 | 2.05 ± 0.01 | 2.56 ± 0.01 |
| MIROC-ES2L CMIP6c     | 1.59 ± 0.02 | 1.03 ± 0.03 | 2.11 ± 0.02 | 2.62 ± 0.02 |
| MPI-ESM1-2-HAM CMIP6c | 2.03 ± 0.04 | 1.43 ± 0.03 | 2.59 ± 0.07 | 2.96 ± 0.08 |
| MPI-ESM1-2-LR CMIP6e  | 1.94 ± 0.04 | 1.46 ± 0.02 | 2.38 ± 0.08 | 2.82 ± 0.09 |
| MPI-ESM1-2-LR CMIP6c  | 1.94 ± 0.03 | 1.46 ± 0.02 | 2.38 ± 0.05 | 2.83 ± 0.06 |
| MRI-ESM2-0 CMIP6e     | 2.97 ± 0.09 | 2.02 ± 0.1  | 3.84 ± 0.15 | 4.81 ± 0.2  |
| MRI-ESM2-0 CMIP6c     | 2.99 ± 0.07 | 2.04 ± 0.11 | 3.85 ± 0.09 | 4.83 ± 0.12 |
| NorESM2-LM CMIP6e     | 1.75 ± 0.04 | 1.48 ± 0.04 | 1.98 ± 0.04 | 2.35 ± 0.05 |
| NorESM2-LM CMIP6c     | 1.7 ± 0.04  | 1.44 ± 0.05 | 1.93 ± 0.03 | 2.28 ± 0.04 |
| NorESM2-MM CMIP6c     | 1.71 ± 0.04 | 1.41 ± 0.04 | 1.98 ± 0.05 | 2.32 ± 0.06 |
| SAM0-UNICON CMIP6c    | 2.65 ± 0.06 | 2.09 ± 0.07 | 3.19 ± 0.1  | 3.87 ± 0.12 |
| TaiESM1 CMIP6c        | 2.55 ± 0.04 | 2.04 ± 0.04 | 3.03 ± 0.07 | 3.44 ± 0.07 |
| UKESM1-0-LL CMIP6e    | 2.82 ± 0.02 | 2.19 ± 0.04 | 3.42 ± 0.03 | 3.94 ± 0.02 |
| UKESM1-0-LL CMIP6c    | 2.81 ± 0.02 | 2.19 ± 0.03 | 3.39 ± 0.02 | 3.9 ± 0.02  |
| GIMMS-LAI4g           | 1.74 ± 0.01 | 1.22 ± 0.01 | 2.22 ± 0.02 | 2.72 ± 0.02 |
| GLASS                 | 1.69 ± 0.06 | 1.19 ± 0.04 | 2.14 ± 0.08 | 2.6 ± 0.1   |
| LAI3g                 | 1.69 ± 0.03 | 1.11 ± 0.02 | 2.22 ± 0.04 | 2.74 ± 0.05 |
| Ncycle MMM CMIP5e     | 2.74 ± 0.05 | 2.09 ± 0.05 | 3.36 ± 0.07 | 3.81 ± 0.07 |
| non-Ncycle MMM CMIP5e | 2.52 ± 0.02 | 1.99 ± 0.02 | 3.0 ± 0.04  | 3.46 ± 0.04 |
| Ncycle MMM CMIP5c     | 2.72 ± 0.04 | 2.06 ± 0.05 | 3.35 ± 0.04 | 3.8 ± 0.04  |
| non-Ncycle MMM CMIP5c | 2.36 ± 0.02 | 1.86 ± 0.02 | 2.81 ± 0.02 | 3.29 ± 0.02 |
| Ncycle MMM CMIP6c     | 2.12 ± 0.03 | 1.71 ± 0.04 | 2.49 ± 0.02 | 2.87 ± 0.02 |
| non-Ncycle MMM CMIP6c | 1.98 ± 0.02 | 1.46 ± 0.03 | 2.45 ± 0.02 | 2.92 ± 0.02 |
| Ncycle MMM CMIP6e     | 2.05 ± 0.02 | 1.53 ± 0.03 | 2.53 ± 0.02 | 2.95 ± 0.02 |
| non-Ncycle MMM CMIP6e | 2.06 ± 0.03 | 1.53 ± 0.04 | 2.54 ± 0.04 | 3.07 ± 0.05 |

Table S2: LAI Trend for 1986-2005 [ $\text{yr}^{-1}$ ]

| Model             | Global          | NH              | SH               | Tropics          |
|-------------------|-----------------|-----------------|------------------|------------------|
| BNU-ESM CMIP5e    | 0.012 ± 0.0013  | 0.0072 ± 0.002  | 0.016 ± 0.0013   | 0.0158 ± 0.0015  |
| BNU-ESM CMIP5c    | 0.0102 ± 0.0008 | 0.0136 ± 0.0016 | 0.0057 ± 0.0012  | 0.0087 ± 0.0012  |
| CESM1-BGC CMIP5e  | 0.004 ± 0.0022  | 0.0067 ± 0.002  | 0.0011 ± 0.0034  | 0.0006 ± 0.0039  |
| CESM1-BGC CMIP5c  | 0.0035 ± 0.0016 | 0.0027 ± 0.0017 | 0.004 ± 0.0017   | 0.0057 ± 0.0016  |
| CanESM2 CMIP5e    | 0.0019 ± 0.0022 | 0.003 ± 0.0005  | 0.0005 ± 0.0043  | 0.0012 ± 0.005   |
| CanESM2 CMIP5c    | 0.0018 ± 0.0017 | 0.002 ± 0.0006  | 0.0012 ± 0.0033  | 0.0028 ± 0.0038  |
| FIO-ESM CMIP5e    | 0.0005 ± 0.0002 | 0.0009 ± 0.0003 | -0.0001 ± 0.0001 | -0.0001 ± 0.0001 |
| GFDL-ESM2G CMIP5e | 0.0055 ± 0.0019 | 0.0028 ± 0.0008 | 0.0077 ± 0.0035  | 0.008 ± 0.0035   |

Continued on next page

Table S2: LAI Trend for 1986-2005 [ $\text{yr}^{-1}$ ]

| Model                  | Global               | NH                  | SH                   | Tropics              |
|------------------------|----------------------|---------------------|----------------------|----------------------|
| GFDL-ESM2G CMIP5c      | $0.0045 \pm 0.0012$  | $0.0071 \pm 0.001$  | $0.0015 \pm 0.0022$  | $0.0011 \pm 0.002$   |
| GFDL-ESM2M CMIP5e      | $0.0034 \pm 0.0019$  | $0.0008 \pm 0.0008$ | $0.0056 \pm 0.0038$  | $0.0087 \pm 0.004$   |
| GFDL-ESM2M CMIP5c      | $0.0024 \pm 0.0026$  | $0.0057 \pm 0.0006$ | $-0.0013 \pm 0.0049$ | $0.0023 \pm 0.0049$  |
| HadGEM2-CC CMIP5c      | $0.0031 \pm 0.0005$  | $0.0036 \pm 0.0007$ | $0.0022 \pm 0.0006$  | $0.002 \pm 0.0008$   |
| HadGEM2-ES CMIP5c      | $0.0046 \pm 0.0006$  | $0.0033 \pm 0.0008$ | $0.0052 \pm 0.001$   | $0.0055 \pm 0.0009$  |
| IPSL-CM5A-LR CMIP5c    | $-0.0022 \pm 0.001$  | $0.0024 \pm 0.0008$ | $-0.0067 \pm 0.0018$ | $-0.0056 \pm 0.0022$ |
| IPSL-CM5A-MR CMIP5c    | $0.0015 \pm 0.001$   | $0.0032 \pm 0.0011$ | $-0.0003 \pm 0.0017$ | $0.0017 \pm 0.0021$  |
| IPSL-CM5B-LR CMIP5c    | $0.0008 \pm 0.0009$  | $0.0043 \pm 0.0007$ | $-0.0027 \pm 0.0019$ | $-0.0029 \pm 0.0025$ |
| MIROC-ESM-CHEM CMIP5c  | $0.0038 \pm 0.0011$  | $0.0016 \pm 0.0008$ | $0.0054 \pm 0.0019$  | $0.008 \pm 0.0022$   |
| MIROC-ESM CMIP5e       | $0.0039 \pm 0.0017$  | $0.0044 \pm 0.0009$ | $0.003 \pm 0.0031$   | $0.0044 \pm 0.0033$  |
| MIROC-ESM CMIP5c       | $0.0015 \pm 0.0011$  | $0.0013 \pm 0.0008$ | $0.0013 \pm 0.002$   | $0.0023 \pm 0.002$   |
| MPI-ESM-LR CMIP5e      | $-0.0003 \pm 0.0008$ | $0.0021 \pm 0.0004$ | $-0.0029 \pm 0.0016$ | $-0.0033 \pm 0.0015$ |
| MPI-ESM-LR CMIP5c      | $0.0014 \pm 0.0013$  | $0.0011 \pm 0.0004$ | $0.0015 \pm 0.0028$  | $0.0004 \pm 0.0028$  |
| MPI-ESM-MR CMIP5c      | $0.0 \pm 0.0008$     | $0.0023 \pm 0.0005$ | $-0.0025 \pm 0.0015$ | $-0.0031 \pm 0.0017$ |
| MRI-ESM1 CMIP5e        | $0.0063 \pm 0.0023$  | $0.0036 \pm 0.0023$ | $0.0084 \pm 0.0034$  | $0.0107 \pm 0.0047$  |
| NorESM1-ME CMIP5e      | $0.006 \pm 0.0015$   | $0.0075 \pm 0.0024$ | $0.0041 \pm 0.0024$  | $0.0037 \pm 0.0029$  |
| NorESM1-ME CMIP5c      | $0.005 \pm 0.0014$   | $0.0092 \pm 0.0019$ | $0.0006 \pm 0.0024$  | $0.0019 \pm 0.0022$  |
| inmcm4 CMIP5c          | $0.0007 \pm 0.0007$  | $0.0014 \pm 0.0009$ | $-0.0 \pm 0.0012$    | $-0.0009 \pm 0.0013$ |
| ACCESS-ESM1-5 CMIP6e   | $0.001 \pm 0.0006$   | $0.0051 \pm 0.0006$ | $-0.0031 \pm 0.0011$ | $-0.0043 \pm 0.0014$ |
| ACCESS-ESM1-5 CMIP6c   | $-0.0014 \pm 0.0008$ | $0.0029 \pm 0.0004$ | $-0.0057 \pm 0.0015$ | $-0.0071 \pm 0.0018$ |
| CESM2-WACCM CMIP6c     | $0.0059 \pm 0.0005$  | $0.0074 \pm 0.0006$ | $0.0043 \pm 0.0007$  | $0.0065 \pm 0.0007$  |
| CESM2 CMIP6c           | $0.0082 \pm 0.0005$  | $0.0096 \pm 0.0008$ | $0.0066 \pm 0.0008$  | $0.0087 \pm 0.0011$  |
| CMCC-CM2-SR5 CMIP6c    | $0.0047 \pm 0.0021$  | $0.0049 \pm 0.0025$ | $0.0044 \pm 0.003$   | $0.0043 \pm 0.0026$  |
| CMCC-ESM2 CMIP6c       | $0.0047 \pm 0.0016$  | $0.0074 \pm 0.0017$ | $0.0021 \pm 0.0028$  | $0.0024 \pm 0.0023$  |
| CNRM-ESM2-1 CMIP6e     | $-0.0002 \pm 0.0011$ | $0.0027 \pm 0.001$  | $-0.003 \pm 0.0019$  | $-0.0025 \pm 0.0016$ |
| CNRM-ESM2-1 CMIP6c     | $0.0037 \pm 0.0009$  | $0.006 \pm 0.0013$  | $0.0012 \pm 0.0015$  | $0.0007 \pm 0.0013$  |
| CanESM5-CanOE CMIP6e   | $0.0048 \pm 0.0011$  | $0.0045 \pm 0.0007$ | $0.0048 \pm 0.0021$  | $0.0056 \pm 0.0025$  |
| CanESM5-CanOE CMIP6c   | $0.0039 \pm 0.0013$  | $0.004 \pm 0.0006$  | $0.0035 \pm 0.0025$  | $0.0046 \pm 0.003$   |
| CanESM5 CMIP6e         | $0.005 \pm 0.0009$   | $0.0044 \pm 0.0006$ | $0.0053 \pm 0.0019$  | $0.0042 \pm 0.0022$  |
| CanESM5 CMIP6c         | $0.0032 \pm 0.0006$  | $0.0043 \pm 0.0006$ | $0.0019 \pm 0.001$   | $0.0027 \pm 0.0011$  |
| EC-Earth3-CC CMIP6e    | $0.0069 \pm 0.0016$  | $0.0089 \pm 0.0011$ | $0.0044 \pm 0.003$   | $0.0059 \pm 0.0029$  |
| EC-Earth3-CC CMIP6c    | $0.0053 \pm 0.0017$  | $0.008 \pm 0.001$   | $0.0023 \pm 0.0034$  | $0.0029 \pm 0.0029$  |
| EC-Earth3-Veg CMIP6c   | $0.0041 \pm 0.0013$  | $0.0085 \pm 0.0009$ | $-0.0007 \pm 0.0021$ | $0.0009 \pm 0.0016$  |
| GFDL-ESM4 CMIP6e       | $0.0044 \pm 0.0012$  | $0.0037 \pm 0.0008$ | $0.0046 \pm 0.0023$  | $0.0047 \pm 0.0029$  |
| GFDL-ESM4 CMIP6c       | $-0.0004 \pm 0.0017$ | $0.0033 \pm 0.0007$ | $-0.0045 \pm 0.0032$ | $-0.0069 \pm 0.0034$ |
| INM-CM4-8 CMIP6c       | $0.0018 \pm 0.0005$  | $0.0018 \pm 0.0008$ | $0.0017 \pm 0.0006$  | $0.002 \pm 0.0008$   |
| INM-CM5-0 CMIP6c       | $0.0023 \pm 0.0005$  | $0.0041 \pm 0.0007$ | $0.0003 \pm 0.0006$  | $0.0005 \pm 0.0006$  |
| IPSL-CM6A-LR CMIP6c    | $0.0052 \pm 0.0008$  | $0.0052 \pm 0.0007$ | $0.0049 \pm 0.0017$  | $0.0064 \pm 0.0018$  |
| MIROC-ES2L CMIP6e      | $0.0022 \pm 0.0003$  | $0.0033 \pm 0.0005$ | $0.0008 \pm 0.0004$  | $0.0016 \pm 0.0005$  |
| MIROC-ES2L CMIP6c      | $0.0033 \pm 0.0003$  | $0.0043 \pm 0.0005$ | $0.0022 \pm 0.0005$  | $0.0032 \pm 0.0006$  |
| MPI-ESM-1-2-HAM CMIP6c | $0.0041 \pm 0.0014$  | $0.0038 \pm 0.0005$ | $0.0042 \pm 0.0025$  | $0.0049 \pm 0.0031$  |
| MPI-ESM1-2-LR CMIP6e   | $0.0014 \pm 0.0015$  | $0.0033 \pm 0.0004$ | $-0.0006 \pm 0.003$  | $-0.0005 \pm 0.0037$ |
| MPI-ESM1-2-LR CMIP6c   | $0.0026 \pm 0.0011$  | $0.0032 \pm 0.0004$ | $0.0019 \pm 0.0021$  | $0.0023 \pm 0.0024$  |

Continued on next page

Table S2: LAI Trend for 1986-2005 [ $\text{yr}^{-1}$ ]

| Model                 | Global              | NH                  | SH                   | Tropics              |
|-----------------------|---------------------|---------------------|----------------------|----------------------|
| MRI-ESM2-0 CMIP6e     | $0.0068 \pm 0.003$  | $0.0137 \pm 0.0022$ | $-0.0006 \pm 0.0058$ | $0.0004 \pm 0.0079$  |
| MRI-ESM2-0 CMIP6c     | $0.0094 \pm 0.0019$ | $0.0156 \pm 0.0023$ | $0.0024 \pm 0.0034$  | $0.0047 \pm 0.0045$  |
| NorESM2-LM CMIP6e     | $0.0064 \pm 0.0007$ | $0.0069 \pm 0.0007$ | $0.0059 \pm 0.001$   | $0.0076 \pm 0.0012$  |
| NorESM2-LM CMIP6c     | $0.0059 \pm 0.0007$ | $0.0076 \pm 0.001$  | $0.0042 \pm 0.001$   | $0.0042 \pm 0.0013$  |
| NorESM2-MM CMIP6c     | $0.0056 \pm 0.0008$ | $0.0067 \pm 0.0005$ | $0.0046 \pm 0.0015$  | $0.0055 \pm 0.0018$  |
| SAM0-UNICON CMIP6c    | $0.0063 \pm 0.0021$ | $0.0075 \pm 0.0022$ | $0.005 \pm 0.0039$   | $0.0078 \pm 0.0046$  |
| TaiESM1 CMIP6c        | $0.0038 \pm 0.0012$ | $0.004 \pm 0.0013$  | $0.0036 \pm 0.0025$  | $0.0049 \pm 0.0026$  |
| UKESM1-0-LL CMIP6e    | $0.0036 \pm 0.0005$ | $0.0052 \pm 0.0008$ | $0.0018 \pm 0.0009$  | $0.0022 \pm 0.0006$  |
| UKESM1-0-LL CMIP6c    | $0.0014 \pm 0.0006$ | $0.0031 \pm 0.0009$ | $-0.0005 \pm 0.0009$ | $-0.0001 \pm 0.0006$ |
| GIMMS-LAI4g           | $0.002 \pm 0.0003$  | $0.0014 \pm 0.0003$ | $0.0021 \pm 0.0006$  | $0.0027 \pm 0.0006$  |
| GLASS                 | $0.0082 \pm 0.0015$ | $0.0047 \pm 0.0013$ | $0.0112 \pm 0.002$   | $0.0128 \pm 0.0023$  |
| LAI3g                 | $0.0019 \pm 0.0011$ | $0.0018 \pm 0.0008$ | $0.0017 \pm 0.0017$  | $0.0019 \pm 0.0021$  |
| Ncycle MMM CMIP5e     | $0.005 \pm 0.0015$  | $0.0071 \pm 0.0012$ | $0.0026 \pm 0.0026$  | $0.0022 \pm 0.0028$  |
| non-Ncycle MMM CMIP5e | $0.0025 \pm 0.0007$ | $0.0023 \pm 0.0003$ | $0.0023 \pm 0.0014$  | $0.0031 \pm 0.0015$  |
| Ncycle MMM CMIP5c     | $0.0042 \pm 0.0011$ | $0.006 \pm 0.0012$  | $0.0023 \pm 0.0017$  | $0.0038 \pm 0.0015$  |
| non-Ncycle MMM CMIP5c | $0.0018 \pm 0.0004$ | $0.003 \pm 0.0003$  | $0.0004 \pm 0.0008$  | $0.001 \pm 0.0007$   |
| Ncycle MMM CMIP6c     | $0.0043 \pm 0.0003$ | $0.0061 \pm 0.0004$ | $0.0024 \pm 0.0005$  | $0.0033 \pm 0.0005$  |
| non-Ncycle MMM CMIP6c | $0.0037 \pm 0.0004$ | $0.0053 \pm 0.0004$ | $0.0017 \pm 0.0006$  | $0.0022 \pm 0.0008$  |
| Ncycle MMM CMIP6e     | $0.0036 \pm 0.0004$ | $0.0054 \pm 0.0004$ | $0.0015 \pm 0.0007$  | $0.0021 \pm 0.0008$  |
| non-Ncycle MMM CMIP6e | $0.0041 \pm 0.0008$ | $0.0058 \pm 0.0005$ | $0.0022 \pm 0.0015$  | $0.0025 \pm 0.0019$  |

Table S3: GPP Mean for 1986-2005 [ $\text{PgC yr}^{-1}$ ]

| Model                 | Global            | NH               | SH                | Tropics          |
|-----------------------|-------------------|------------------|-------------------|------------------|
| BNU-ESM CMIP5e        | $83.54 \pm 2.48$  | $30.35 \pm 1.3$  | $53.19 \pm 1.54$  | $47.13 \pm 1.18$ |
| BNU-ESM CMIP5c        | $86.26 \pm 2.0$   | $33.66 \pm 1.35$ | $52.6 \pm 0.92$   | $46.93 \pm 0.92$ |
| CESM1-BGC CMIP5e      | $107.42 \pm 2.23$ | $34.94 \pm 1.1$  | $72.49 \pm 1.3$   | $61.98 \pm 1.12$ |
| CESM1-BGC CMIP5c      | $106.12 \pm 1.7$  | $34.5 \pm 0.78$  | $71.62 \pm 1.06$  | $61.24 \pm 0.93$ |
| CanESM2 CMIP5e        | $103.74 \pm 2.72$ | $32.32 \pm 0.86$ | $71.42 \pm 2.76$  | $56.61 \pm 2.07$ |
| CanESM2 CMIP5c        | $104.37 \pm 2.41$ | $32.66 \pm 0.74$ | $71.71 \pm 2.09$  | $56.66 \pm 1.78$ |
| FIO-ESM CMIP5e        | $151.2 \pm 2.28$  | $44.86 \pm 0.99$ | $106.34 \pm 1.69$ | $91.94 \pm 1.59$ |
| GFDL-ESM2G CMIP5e     | $139.01 \pm 4.89$ | $46.29 \pm 1.23$ | $92.72 \pm 4.42$  | $75.82 \pm 2.78$ |
| GFDL-ESM2G CMIP5c     | $134.03 \pm 3.53$ | $44.88 \pm 1.67$ | $89.15 \pm 2.86$  | $73.24 \pm 1.98$ |
| GFDL-ESM2M CMIP5e     | $137.59 \pm 5.15$ | $46.76 \pm 1.42$ | $90.83 \pm 5.5$   | $75.22 \pm 3.86$ |
| GFDL-ESM2M CMIP5c     | $132.97 \pm 5.94$ | $44.11 \pm 1.4$  | $88.86 \pm 6.12$  | $72.58 \pm 4.27$ |
| HadGEM2-CC CMIP5c     | $111.57 \pm 3.19$ | $36.26 \pm 1.82$ | $75.31 \pm 2.08$  | $64.71 \pm 2.07$ |
| HadGEM2-ES CMIP5c     | $116.03 \pm 3.77$ | $37.6 \pm 1.35$  | $78.44 \pm 3.04$  | $67.96 \pm 2.77$ |
| IPSL-CM5A-LR CMIP5c   | $133.84 \pm 2.22$ | $58.96 \pm 1.67$ | $74.87 \pm 1.59$  | $67.0 \pm 1.47$  |
| IPSL-CM5A-MR CMIP5c   | $131.41 \pm 3.23$ | $58.77 \pm 1.99$ | $72.64 \pm 2.0$   | $64.27 \pm 1.9$  |
| IPSL-CM5B-LR CMIP5c   | $115.58 \pm 2.65$ | $51.95 \pm 1.69$ | $63.63 \pm 1.87$  | $54.03 \pm 1.64$ |
| MIROC-ESM-CHEM CMIP5c | $109.79 \pm 2.5$  | $41.62 \pm 0.96$ | $68.17 \pm 1.95$  | $57.0 \pm 1.64$  |
| MIROC-ESM CMIP5e      | $110.68 \pm 2.51$ | $42.76 \pm 1.43$ | $67.93 \pm 1.85$  | $56.45 \pm 1.52$ |

Continued on next page

Table S3: GPP Mean for 1986-2005 [PgC yr<sup>-1</sup>]

| Model                  | Global        | NH           | SH           | Tropics       |
|------------------------|---------------|--------------|--------------|---------------|
| MIROC-ESM CMIP5c       | 108.34 ± 2.73 | 42.38 ± 1.05 | 65.96 ± 2.05 | 54.98 ± 1.75  |
| MPI-ESM-LR CMIP5e      | 145.6 ± 3.12  | 55.14 ± 1.81 | 90.46 ± 2.43 | 72.51 ± 1.3   |
| MPI-ESM-LR CMIP5c      | 145.66 ± 3.99 | 55.28 ± 1.19 | 90.38 ± 3.64 | 71.76 ± 1.91  |
| MPI-ESM-MR CMIP5c      | 149.88 ± 3.69 | 57.58 ± 2.1  | 92.29 ± 2.32 | 73.62 ± 1.58  |
| MRI-ESM1 CMIP5e        | 191.82 ± 3.1  | 64.52 ± 1.47 | 127.31 ± 2.0 | 110.68 ± 1.73 |
| NorESM1-ME CMIP5e      | 107.22 ± 1.74 | 35.87 ± 0.89 | 71.34 ± 1.16 | 61.16 ± 1.09  |
| NorESM1-ME CMIP5c      | 106.83 ± 1.66 | 35.42 ± 1.0  | 71.4 ± 0.95  | 61.12 ± 0.82  |
| inmcm4 CMIP5c          | 109.19 ± 1.97 | 37.4 ± 0.8   | 71.78 ± 1.69 | 62.96 ± 1.45  |
| ACCESS-ESM1-5 CMIP6e   | 100.33 ± 1.3  | 33.27 ± 1.15 | 67.06 ± 0.93 | 57.17 ± 0.88  |
| ACCESS-ESM1-5 CMIP6c   | 101.48 ± 1.28 | 34.39 ± 0.91 | 67.09 ± 1.45 | 56.94 ± 1.3   |
| CESM2-WACCM CMIP6c     | 90.96 ± 1.73  | 34.31 ± 1.12 | 56.66 ± 0.88 | 47.18 ± 0.77  |
| CESM2 CMIP6c           | 91.09 ± 2.44  | 35.39 ± 1.39 | 55.7 ± 1.38  | 46.66 ± 1.13  |
| CMCC-CM2-SR5 CMIP6c    | 83.79 ± 2.16  | 37.64 ± 1.26 | 46.15 ± 1.4  | 38.25 ± 0.89  |
| CMCC-ESM2 CMIP6c       | 84.36 ± 1.65  | 37.06 ± 1.23 | 47.3 ± 0.93  | 39.37 ± 0.63  |
| CNRM-ESM2-1 CMIP6e     | 84.11 ± 2.15  | 33.15 ± 1.12 | 50.96 ± 2.05 | 41.88 ± 1.15  |
| CNRM-ESM2-1 CMIP6c     | 84.18 ± 2.36  | 33.49 ± 1.67 | 50.7 ± 1.62  | 41.55 ± 0.93  |
| CanESM5-CanOE CMIP6e   | 114.7 ± 2.8   | 40.82 ± 1.31 | 73.88 ± 1.76 | 60.75 ± 1.44  |
| CanESM5-CanOE CMIP6c   | 113.66 ± 3.02 | 40.84 ± 1.3  | 72.83 ± 2.08 | 59.87 ± 1.72  |
| CanESM5 CMIP6e         | 114.73 ± 2.6  | 41.34 ± 1.21 | 73.39 ± 1.74 | 60.32 ± 1.21  |
| CanESM5 CMIP6c         | 114.82 ± 2.16 | 41.68 ± 1.09 | 73.15 ± 1.25 | 60.19 ± 1.02  |
| EC-Earth3-CC CMIP6e    | 121.52 ± 3.19 | 47.03 ± 2.28 | 74.49 ± 1.47 | 56.11 ± 0.96  |
| EC-Earth3-CC CMIP6c    | 119.45 ± 2.5  | 46.11 ± 1.75 | 73.34 ± 1.47 | 55.17 ± 1.11  |
| EC-Earth3-Veg CMIP6c   | 117.81 ± 2.27 | 45.46 ± 1.53 | 72.36 ± 1.28 | 54.63 ± 1.0   |
| GFDL-ESM4 CMIP6e       | 92.19 ± 2.39  | 34.82 ± 1.26 | 57.38 ± 1.56 | 50.38 ± 1.34  |
| GFDL-ESM4 CMIP6c       | 88.07 ± 1.89  | 32.36 ± 1.01 | 55.71 ± 1.61 | 49.03 ± 1.2   |
| INM-CM4-8 CMIP6c       | 123.16 ± 4.08 | 41.22 ± 1.16 | 81.94 ± 3.0  | 71.68 ± 2.69  |
| INM-CM5-0 CMIP6c       | 126.98 ± 2.59 | 42.43 ± 1.25 | 84.54 ± 1.51 | 74.08 ± 1.36  |
| IPSL-CM6A-LR CMIP6c    | 97.25 ± 2.63  | 32.08 ± 1.14 | 65.17 ± 1.86 | 54.93 ± 1.54  |
| MIROC-ES2L CMIP6e      | 88.02 ± 1.45  | 37.68 ± 1.03 | 50.33 ± 0.59 | 43.68 ± 0.53  |
| MIROC-ES2L CMIP6c      | 91.73 ± 1.73  | 39.27 ± 1.16 | 52.46 ± 0.84 | 45.33 ± 0.76  |
| MPI-ESM-1-2-HAM CMIP6c | 128.61 ± 5.77 | 46.29 ± 2.63 | 82.32 ± 3.65 | 67.99 ± 2.89  |
| MPI-ESM1-2-LR CMIP6e   | 123.7 ± 3.79  | 48.04 ± 1.64 | 75.66 ± 3.0  | 64.42 ± 2.21  |
| MPI-ESM1-2-LR CMIP6c   | 122.46 ± 3.66 | 47.92 ± 1.83 | 74.55 ± 2.43 | 63.63 ± 1.91  |
| MRI-ESM2-0 CMIP6e      | 151.86 ± 4.17 | 63.44 ± 3.0  | 88.42 ± 2.98 | 79.52 ± 2.71  |
| MRI-ESM2-0 CMIP6c      | 151.98 ± 4.62 | 63.74 ± 3.92 | 88.25 ± 2.09 | 79.5 ± 1.83   |
| NorESM2-LM CMIP6e      | 88.78 ± 2.01  | 33.03 ± 1.0  | 55.75 ± 1.19 | 47.44 ± 1.03  |
| NorESM2-LM CMIP6c      | 86.71 ± 1.82  | 32.15 ± 1.12 | 54.56 ± 1.04 | 46.21 ± 0.91  |
| NorESM2-MM CMIP6c      | 88.13 ± 1.8   | 32.6 ± 0.91  | 55.53 ± 1.36 | 46.37 ± 1.09  |
| SAM0-UNICON CMIP6c     | 106.57 ± 2.12 | 34.85 ± 0.94 | 71.72 ± 1.77 | 64.01 ± 1.77  |
| TaiESM1 CMIP6c         | 106.56 ± 1.48 | 35.05 ± 1.03 | 71.51 ± 0.8  | 60.03 ± 0.65  |
| UKESM1-0-LL CMIP6e     | 108.72 ± 3.39 | 38.47 ± 1.76 | 70.25 ± 2.79 | 59.24 ± 2.45  |
| UKESM1-0-LL CMIP6c     | 106.73 ± 2.97 | 38.3 ± 1.47  | 68.43 ± 2.69 | 57.66 ± 2.18  |
| GLASS                  | 108.26 ± 3.43 | 39.19 ± 1.34 | 69.08 ± 2.28 | 59.14 ± 1.7   |

Continued on next page

Table S3: GPP Mean for 1986-2005 [ $\text{PgC yr}^{-1}$ ]

| Model                 | Global            | NH               | SH               | Tropics          |
|-----------------------|-------------------|------------------|------------------|------------------|
| FLUXCOM               | $93.04 \pm 0.41$  | $31.09 \pm 0.2$  | $61.95 \pm 0.49$ | $55.34 \pm 0.31$ |
| MTE                   | $102.63 \pm 1.17$ | $37.5 \pm 0.75$  | $65.13 \pm 0.68$ | $56.72 \pm 0.5$  |
| Ncycle MMM CMIP5e     | $107.32 \pm 1.88$ | $35.4 \pm 0.9$   | $71.92 \pm 1.12$ | $61.57 \pm 0.98$ |
| non-Ncycle MMM CMIP5e | $132.9 \pm 2.07$  | $45.37 \pm 0.91$ | $87.52 \pm 1.53$ | $73.29 \pm 1.18$ |
| Ncycle MMM CMIP5c     | $106.47 \pm 1.6$  | $34.96 \pm 0.82$ | $71.51 \pm 0.87$ | $61.18 \pm 0.78$ |
| non-Ncycle MMM CMIP5c | $120.64 \pm 2.23$ | $45.22 \pm 1.1$  | $75.41 \pm 1.26$ | $63.41 \pm 1.1$  |
| Ncycle MMM CMIP6c     | $99.85 \pm 1.59$  | $37.89 \pm 1.05$ | $61.95 \pm 0.64$ | $51.53 \pm 0.57$ |
| non-Ncycle MMM CMIP6c | $114.3 \pm 2.6$   | $41.57 \pm 1.45$ | $72.73 \pm 1.22$ | $62.09 \pm 1.04$ |
| Ncycle MMM CMIP6e     | $105.18 \pm 2.15$ | $39.59 \pm 1.32$ | $65.59 \pm 1.09$ | $54.68 \pm 0.91$ |
| non-Ncycle MMM CMIP6e | $111.52 \pm 2.12$ | $42.71 \pm 1.38$ | $68.81 \pm 1.05$ | $58.57 \pm 0.87$ |

Table S4: GPP Trend for 1986-2005 [ $\text{PgC yr}^{-2}$ ]

| Model                 | Global              | NH                  | SH                   | Tropics             |
|-----------------------|---------------------|---------------------|----------------------|---------------------|
| BNU-ESM CMIP5e        | $0.3915 \pm 0.0353$ | $0.1594 \pm 0.0357$ | $0.2321 \pm 0.0283$  | $0.1665 \pm 0.026$  |
| BNU-ESM CMIP5c        | $0.3177 \pm 0.0272$ | $0.2067 \pm 0.023$  | $0.111 \pm 0.0258$   | $0.1123 \pm 0.0257$ |
| CESM1-BGC CMIP5e      | $0.2964 \pm 0.0552$ | $0.1536 \pm 0.0246$ | $0.1428 \pm 0.0395$  | $0.1127 \pm 0.0359$ |
| CESM1-BGC CMIP5c      | $0.2269 \pm 0.0419$ | $0.0828 \pm 0.0242$ | $0.1441 \pm 0.0254$  | $0.1322 \pm 0.02$   |
| CanESM2 CMIP5e        | $0.1535 \pm 0.1023$ | $0.113 \pm 0.0215$  | $0.0405 \pm 0.1098$  | $0.0422 \pm 0.0818$ |
| CanESM2 CMIP5c        | $0.1575 \pm 0.0886$ | $0.0826 \pm 0.0222$ | $0.075 \pm 0.0812$   | $0.0879 \pm 0.0681$ |
| FIO-ESM CMIP5e        | $0.3111 \pm 0.0536$ | $0.1364 \pm 0.0228$ | $0.1746 \pm 0.0536$  | $0.1641 \pm 0.0502$ |
| GFDL-ESM2G CMIP5e     | $0.4753 \pm 0.1595$ | $0.161 \pm 0.0312$  | $0.3143 \pm 0.1598$  | $0.2258 \pm 0.0971$ |
| GFDL-ESM2G CMIP5c     | $0.4292 \pm 0.098$  | $0.2338 \pm 0.0376$ | $0.1955 \pm 0.1043$  | $0.1751 \pm 0.0672$ |
| GFDL-ESM2M CMIP5e     | $0.1855 \pm 0.2006$ | $0.0493 \pm 0.0553$ | $0.1362 \pm 0.2171$  | $0.1544 \pm 0.1496$ |
| GFDL-ESM2M CMIP5c     | $0.2511 \pm 0.2294$ | $0.1939 \pm 0.0321$ | $0.0571 \pm 0.2438$  | $0.1613 \pm 0.166$  |
| HadGEM2-CC CMIP5c     | $0.4561 \pm 0.0713$ | $0.2295 \pm 0.0498$ | $0.2266 \pm 0.0649$  | $0.2017 \pm 0.069$  |
| HadGEM2-ES CMIP5c     | $0.5642 \pm 0.0741$ | $0.159 \pm 0.0395$  | $0.4051 \pm 0.0774$  | $0.3473 \pm 0.0763$ |
| IPSL-CM5A-LR CMIP5c   | $0.2351 \pm 0.0689$ | $0.2287 \pm 0.0394$ | $0.0064 \pm 0.0635$  | $0.0757 \pm 0.0559$ |
| IPSL-CM5A-MR CMIP5c   | $0.4459 \pm 0.0747$ | $0.2547 \pm 0.0519$ | $0.1913 \pm 0.0657$  | $0.2099 \pm 0.0574$ |
| IPSL-CM5B-LR CMIP5c   | $0.3361 \pm 0.0697$ | $0.2477 \pm 0.0336$ | $0.0884 \pm 0.0716$  | $0.0885 \pm 0.0619$ |
| MIROC-ESM-CHEM CMIP5c | $0.3517 \pm 0.0552$ | $0.1065 \pm 0.0287$ | $0.2452 \pm 0.0517$  | $0.2028 \pm 0.0443$ |
| MIROC-ESM CMIP5e      | $0.3434 \pm 0.0589$ | $0.1697 \pm 0.0404$ | $0.1738 \pm 0.0613$  | $0.1635 \pm 0.0469$ |
| MIROC-ESM CMIP5c      | $0.3824 \pm 0.061$  | $0.129 \pm 0.0285$  | $0.2534 \pm 0.0556$  | $0.2379 \pm 0.0416$ |
| MPI-ESM-LR CMIP5e     | $0.3901 \pm 0.0835$ | $0.2193 \pm 0.0505$ | $0.1709 \pm 0.0881$  | $0.1509 \pm 0.0378$ |
| MPI-ESM-LR CMIP5c     | $0.5023 \pm 0.1059$ | $0.1328 \pm 0.0358$ | $0.3695 \pm 0.1157$  | $0.2491 \pm 0.0484$ |
| MPI-ESM-MR CMIP5c     | $0.5187 \pm 0.0816$ | $0.2771 \pm 0.0523$ | $0.2415 \pm 0.0727$  | $0.2042 \pm 0.0405$ |
| MRI-ESM1 CMIP5e       | $0.2532 \pm 0.1083$ | $0.0754 \pm 0.0558$ | $0.1777 \pm 0.0678$  | $0.1459 \pm 0.0596$ |
| NorESM1-ME CMIP5e     | $0.249 \pm 0.037$   | $0.12 \pm 0.0214$   | $0.129 \pm 0.0349$   | $0.1087 \pm 0.0349$ |
| NorESM1-ME CMIP5c     | $0.2346 \pm 0.0367$ | $0.1483 \pm 0.0192$ | $0.0862 \pm 0.0318$  | $0.0794 \pm 0.0268$ |
| inmcm4 CMIP5c         | $0.1868 \pm 0.0651$ | $0.0665 \pm 0.0276$ | $0.1203 \pm 0.0611$  | $0.0776 \pm 0.0546$ |
| ACCESS-ESM1-5 CMIP6e  | $0.1563 \pm 0.0361$ | $0.1833 \pm 0.0153$ | $-0.0269 \pm 0.0366$ | $-0.0358 \pm 0.034$ |
| ACCESS-ESM1-5 CMIP6c  | $0.03 \pm 0.0503$   | $0.146 \pm 0.011$   | $-0.116 \pm 0.0509$  | $-0.0997 \pm 0.046$ |

Continued on next page

Table S4: GPP Trend for 1986-2005 [ $\text{PgC yr}^{-2}$ ]

| Model                 | Global          | NH              | SH               | Tropics          |
|-----------------------|-----------------|-----------------|------------------|------------------|
| CESM2-WACCM CMIP6c    | 0.2483 ± 0.0368 | 0.1584 ± 0.0245 | 0.0899 ± 0.028   | 0.0957 ± 0.0206  |
| CESM2 CMIP6c          | 0.3699 ± 0.0433 | 0.2041 ± 0.0273 | 0.1658 ± 0.0385  | 0.1402 ± 0.0306  |
| CMCC-CM2-SR5 CMIP6c   | 0.275 ± 0.0566  | 0.1526 ± 0.0351 | 0.1224 ± 0.0477  | 0.0931 ± 0.0278  |
| CMCC-ESM2 CMIP6c      | 0.2432 ± 0.032  | 0.1699 ± 0.0283 | 0.0732 ± 0.0328  | 0.0556 ± 0.0212  |
| CNRM-ESM2-1 CMIP6e    | 0.0254 ± 0.0855 | 0.1013 ± 0.0376 | -0.0759 ± 0.0795 | -0.0334 ± 0.045  |
| CNRM-ESM2-1 CMIP6c    | 0.2927 ± 0.0639 | 0.2179 ± 0.0424 | 0.0749 ± 0.062   | 0.0456 ± 0.0354  |
| CanESM5-CanOE CMIP6e  | 0.3806 ± 0.0666 | 0.1786 ± 0.0312 | 0.2019 ± 0.0517  | 0.1724 ± 0.0406  |
| CanESM5-CanOE CMIP6c  | 0.4188 ± 0.0691 | 0.1931 ± 0.0252 | 0.2256 ± 0.0636  | 0.1936 ± 0.051   |
| CanESM5 CMIP6e        | 0.3736 ± 0.0545 | 0.1698 ± 0.0268 | 0.2038 ± 0.0499  | 0.1356 ± 0.0364  |
| CanESM5 CMIP6c        | 0.3238 ± 0.0402 | 0.143 ± 0.0272  | 0.1808 ± 0.026   | 0.1474 ± 0.0211  |
| EC-Earth3-CC CMIP6e   | 0.4508 ± 0.0697 | 0.335 ± 0.0451  | 0.1159 ± 0.052   | 0.1045 ± 0.029   |
| EC-Earth3-CC CMIP6c   | 0.2899 ± 0.0724 | 0.2531 ± 0.0357 | 0.0369 ± 0.0578  | 0.0732 ± 0.0407  |
| EC-Earth3-Veg CMIP6c  | 0.2826 ± 0.0613 | 0.2198 ± 0.0319 | 0.0628 ± 0.0489  | 0.097 ± 0.0325   |
| GFDL-ESM4 CMIP6e      | 0.3558 ± 0.0449 | 0.1912 ± 0.0223 | 0.1645 ± 0.0485  | 0.1283 ± 0.0438  |
| GFDL-ESM4 CMIP6c      | 0.1299 ± 0.069  | 0.1378 ± 0.0236 | -0.0079 ± 0.0643 | -0.0335 ± 0.0472 |
| INM-CM4-8 CMIP6c      | 0.5962 ± 0.0823 | 0.1647 ± 0.0249 | 0.4314 ± 0.0631  | 0.3916 ± 0.0546  |
| INM-CM5-0 CMIP6c      | 0.3037 ± 0.0746 | 0.1643 ± 0.0314 | 0.1394 ± 0.0504  | 0.1419 ± 0.0427  |
| IPSL-CM6A-LR CMIP6c   | 0.4168 ± 0.0369 | 0.1655 ± 0.0233 | 0.2512 ± 0.0446  | 0.2223 ± 0.0316  |
| MIROC-ES2L CMIP6e     | 0.2258 ± 0.0223 | 0.1439 ± 0.0232 | 0.0819 ± 0.0134  | 0.078 ± 0.0103   |
| MIROC-ES2L CMIP6c     | 0.2643 ± 0.0295 | 0.1505 ± 0.0295 | 0.1138 ± 0.0201  | 0.105 ± 0.0173   |
| MPI-ESM1-2-HAM CMIP6c | 0.7854 ± 0.136  | 0.3564 ± 0.0625 | 0.429 ± 0.1046   | 0.371 ± 0.075    |
| MPI-ESM1-2-LR CMIP6e  | 0.4284 ± 0.1123 | 0.2526 ± 0.0273 | 0.1758 ± 0.1121  | 0.1707 ± 0.0784  |
| MPI-ESM1-2-LR CMIP6c  | 0.5008 ± 0.0854 | 0.2469 ± 0.044  | 0.2539 ± 0.0763  | 0.2459 ± 0.0491  |
| MRI-ESM2-0 CMIP6e     | 0.4292 ± 0.1318 | 0.4558 ± 0.0525 | -0.0266 ± 0.1186 | -0.0055 ± 0.108  |
| MRI-ESM2-0 CMIP6c     | 0.6198 ± 0.1118 | 0.5943 ± 0.069  | 0.0254 ± 0.083   | 0.0384 ± 0.0723  |
| NorESM2-LM CMIP6e     | 0.2863 ± 0.0433 | 0.1435 ± 0.0213 | 0.1429 ± 0.0332  | 0.1232 ± 0.029   |
| NorESM2-LM CMIP6c     | 0.2658 ± 0.0363 | 0.1524 ± 0.0266 | 0.1135 ± 0.0317  | 0.0902 ± 0.0296  |
| NorESM2-MM CMIP6c     | 0.2231 ± 0.0491 | 0.1395 ± 0.0152 | 0.0836 ± 0.0505  | 0.0667 ± 0.0406  |
| SAM0-UNICON CMIP6c    | 0.2424 ± 0.0624 | 0.1189 ± 0.0247 | 0.1234 ± 0.0642  | 0.1242 ± 0.064   |
| TaiESM1 CMIP6c        | 0.2062 ± 0.0334 | 0.1346 ± 0.0259 | 0.0716 ± 0.0269  | 0.0599 ± 0.0216  |
| UKESM1-0-LL CMIP6e    | 0.461 ± 0.0834  | 0.2334 ± 0.0454 | 0.2277 ± 0.0993  | 0.2065 ± 0.0864  |
| UKESM1-0-LL CMIP6c    | 0.1936 ± 0.1111 | 0.1672 ± 0.0442 | 0.0264 ± 0.1086  | 0.0476 ± 0.0874  |
| GLASS                 | 0.4466 ± 0.0871 | 0.1759 ± 0.0337 | 0.2707 ± 0.0646  | 0.1939 ± 0.0502  |
| FLUXCOM               | -               | -               | -                | -                |
| MTE                   | -               | -               | -                | -                |
| Ncycle MMM CMIP5e     | 0.2727 ± 0.0388 | 0.1368 ± 0.0158 | 0.1359 ± 0.031   | 0.1107 ± 0.0293  |
| non-Ncycle MMM CMIP5e | 0.3127 ± 0.0367 | 0.1354 ± 0.0176 | 0.1774 ± 0.0444  | 0.1516 ± 0.0306  |
| Ncycle MMM CMIP5c     | 0.2307 ± 0.0332 | 0.1156 ± 0.0179 | 0.1152 ± 0.0217  | 0.1058 ± 0.0187  |
| non-Ncycle MMM CMIP5c | 0.3657 ± 0.0224 | 0.1816 ± 0.0092 | 0.1841 ± 0.0251  | 0.1731 ± 0.0163  |
| Ncycle MMM CMIP6c     | 0.2594 ± 0.0162 | 0.1722 ± 0.0098 | 0.0871 ± 0.0148  | 0.0853 ± 0.0106  |
| non-Ncycle MMM CMIP6c | 0.4317 ± 0.0191 | 0.2374 ± 0.014  | 0.1943 ± 0.0164  | 0.1686 ± 0.012   |
| Ncycle MMM CMIP6e     | 0.3336 ± 0.0335 | 0.2147 ± 0.0146 | 0.119 ± 0.0334   | 0.1073 ± 0.0258  |
| non-Ncycle MMM CMIP6e | 0.3128 ± 0.0413 | 0.2193 ± 0.0187 | 0.0935 ± 0.0357  | 0.0794 ± 0.0293  |



Table S5: NBP Mean for 1986-2005 [PgC yr<sup>-1</sup>]

| Model                 | Global       | NH           | SH           | Tropics      |
|-----------------------|--------------|--------------|--------------|--------------|
| BNU-ESM CMIP5e        | 0.36 ± 0.92  | 0.39 ± 0.69  | -0.03 ± 0.94 | 0.01 ± 0.96  |
| BNU-ESM CMIP5c        | 1.32 ± 1.15  | 0.89 ± 0.59  | 0.43 ± 1.04  | 0.39 ± 0.99  |
| CESM1-BGC CMIP5e      | -0.08 ± 0.97 | 0.06 ± 0.52  | -0.14 ± 0.65 | -0.11 ± 0.55 |
| CESM1-BGC CMIP5c      | -0.14 ± 0.67 | 0.02 ± 0.36  | -0.17 ± 0.6  | -0.12 ± 0.41 |
| CanESM2 CMIP5e        | 0.3 ± 2.47   | 0.23 ± 0.54  | 0.08 ± 2.59  | 0.12 ± 1.94  |
| CanESM2 CMIP5c        | 0.21 ± 2.07  | 0.11 ± 0.34  | 0.1 ± 1.89   | 0.07 ± 1.4   |
| FIO-ESM CMIP5e        | 1.84 ± 0.64  | 0.78 ± 0.17  | 1.06 ± 0.61  | 0.91 ± 0.62  |
| GFDL-ESM2G CMIP5e     | 0.9 ± 2.95   | 0.39 ± 0.78  | 0.5 ± 2.83   | 0.23 ± 2.01  |
| GFDL-ESM2G CMIP5c     | 0.62 ± 2.16  | 0.39 ± 0.9   | 0.23 ± 1.86  | 0.01 ± 1.3   |
| GFDL-ESM2M CMIP5e     | 0.31 ± 3.0   | 0.22 ± 1.09  | 0.08 ± 3.54  | 0.02 ± 2.74  |
| GFDL-ESM2M CMIP5c     | 0.55 ± 3.91  | 0.29 ± 0.94  | 0.26 ± 4.04  | 0.09 ± 3.22  |
| HadGEM2-CC CMIP5c     | 0.98 ± 1.29  | 0.82 ± 0.67  | 0.16 ± 1.06  | 0.09 ± 1.02  |
| HadGEM2-ES CMIP5c     | 1.35 ± 1.21  | 0.76 ± 0.39  | 0.58 ± 1.17  | 0.53 ± 1.09  |
| IPSL-CM5A-LR CMIP5c   | 0.73 ± 1.16  | 0.45 ± 0.6   | 0.27 ± 1.07  | 0.36 ± 0.99  |
| IPSL-CM5A-MR CMIP5c   | 0.97 ± 1.46  | 0.44 ± 0.77  | 0.53 ± 1.26  | 0.63 ± 1.12  |
| IPSL-CM5B-LR CMIP5c   | 1.57 ± 1.31  | 0.84 ± 0.48  | 0.73 ± 1.33  | 0.75 ± 1.22  |
| MIROC-ESM-CHEM CMIP5c | 1.68 ± 1.41  | 0.91 ± 0.51  | 0.77 ± 1.27  | 0.61 ± 1.1   |
| MIROC-ESM CMIP5e      | 1.19 ± 1.66  | 1.28 ± 0.59  | -0.1 ± 1.53  | -0.16 ± 1.31 |
| MIROC-ESM CMIP5c      | 0.65 ± 1.52  | 1.14 ± 0.61  | -0.49 ± 1.37 | -0.44 ± 1.06 |
| MPI-ESM-LR CMIP5e     | 1.28 ± 1.16  | 1.2 ± 0.69   | 0.08 ± 0.94  | -0.02 ± 0.45 |
| MPI-ESM-LR CMIP5c     | 1.49 ± 1.72  | 1.08 ± 0.64  | 0.41 ± 1.39  | 0.11 ± 0.77  |
| MPI-ESM-MR CMIP5c     | 1.69 ± 1.25  | 1.24 ± 0.63  | 0.45 ± 1.01  | 0.19 ± 0.64  |
| MRI-ESM1 CMIP5e       | 2.05 ± 0.98  | 1.76 ± 0.54  | 0.29 ± 0.8   | 0.29 ± 0.74  |
| NorESM1-ME CMIP5e     | -0.11 ± 0.55 | -0.02 ± 0.42 | -0.1 ± 0.55  | -0.09 ± 0.45 |
| NorESM1-ME CMIP5c     | -0.08 ± 0.84 | -0.04 ± 0.37 | -0.04 ± 0.71 | -0.05 ± 0.58 |
| inmcm4 CMIP5c         | 2.18 ± 1.15  | 0.72 ± 0.5   | 1.46 ± 1.07  | 1.27 ± 0.97  |
| ACCESS-ESM1-5 CMIP6e  | 1.31 ± 0.72  | 0.84 ± 0.34  | 0.47 ± 0.75  | 0.36 ± 0.64  |
| ACCESS-ESM1-5 CMIP6c  | 0.77 ± 1.13  | 0.78 ± 0.31  | -0.01 ± 0.97 | -0.06 ± 0.84 |
| CESM2-WACCM CMIP6c    | 1.03 ± 0.54  | 0.51 ± 0.34  | 0.52 ± 0.35  | 0.5 ± 0.23   |
| CESM2 CMIP6c          | 1.08 ± 0.58  | 0.6 ± 0.32   | 0.49 ± 0.4   | 0.46 ± 0.35  |
| CMCC-CM2-SR5 CMIP6c   | 0.89 ± 1.12  | 0.19 ± 0.58  | 0.7 ± 0.89   | 0.63 ± 0.54  |
| CMCC-ESM2 CMIP6c      | 0.89 ± 0.63  | 0.22 ± 0.52  | 0.67 ± 0.57  | 0.62 ± 0.35  |
| CNRM-ESM2-1 CMIP6e    | 1.86 ± 1.02  | 1.46 ± 0.45  | 0.4 ± 0.82   | 0.25 ± 0.52  |
| CNRM-ESM2-1 CMIP6c    | 1.89 ± 0.69  | 1.55 ± 0.53  | 0.34 ± 0.65  | 0.16 ± 0.44  |
| CanESM5-CanOE CMIP6e  | 0.51 ± 1.46  | 0.13 ± 0.51  | 0.38 ± 1.15  | 0.41 ± 1.0   |
| CanESM5-CanOE CMIP6c  | 0.08 ± 1.87  | -0.05 ± 0.52 | 0.13 ± 1.54  | 0.21 ± 1.36  |
| CanESM5 CMIP6e        | 0.62 ± 1.29  | 0.19 ± 0.32  | 0.43 ± 1.12  | 0.39 ± 0.95  |
| CanESM5 CMIP6c        | 0.44 ± 0.69  | 0.15 ± 0.32  | 0.29 ± 0.51  | 0.35 ± 0.47  |
| EC-Earth3-CC CMIP6e   | 0.62 ± 1.77  | 0.6 ± 0.86   | 0.01 ± 1.48  | 0.28 ± 1.02  |
| EC-Earth3-CC CMIP6c   | 0.44 ± 1.8   | 0.51 ± 1.0   | -0.07 ± 1.73 | 0.16 ± 1.36  |
| EC-Earth3-Veg CMIP6c  | 0.49 ± 1.69  | 0.41 ± 0.79  | 0.08 ± 1.36  | 0.27 ± 1.12  |
| GFDL-ESM4 CMIP6e      | 0.28 ± 1.28  | 0.19 ± 0.35  | 0.09 ± 1.12  | 0.12 ± 1.04  |
| GFDL-ESM4 CMIP6c      | -0.13 ± 1.63 | -0.08 ± 0.38 | -0.05 ± 1.44 | 0.05 ± 1.15  |

Continued on next page

Table S5: NBP Mean for 1986-2005 [PgC yr<sup>-1</sup>]

| Model                   | Global       | NH           | SH           | Tropics      |
|-------------------------|--------------|--------------|--------------|--------------|
| INM-CM4-8 CMIP6c        | 4.46 ± 2.21  | 1.55 ± 0.75  | 2.91 ± 1.54  | 2.55 ± 1.23  |
| INM-CM5-0 CMIP6c        | 3.7 ± 2.05   | 1.44 ± 0.85  | 2.25 ± 1.36  | 1.94 ± 1.19  |
| IPSL-CM6A-LR CMIP6c     | 1.06 ± 0.72  | 0.83 ± 0.21  | 0.22 ± 0.71  | 0.19 ± 0.57  |
| MIROC-ES2L CMIP6e       | 1.61 ± 0.64  | 1.38 ± 0.34  | 0.23 ± 0.52  | 0.27 ± 0.42  |
| MIROC-ES2L CMIP6c       | 1.99 ± 1.24  | 1.49 ± 0.4   | 0.5 ± 1.03   | 0.46 ± 0.95  |
| MPI-ESM1-1-2-HAM CMIP6c | 1.04 ± 1.31  | 0.33 ± 0.4   | 0.71 ± 1.19  | 0.58 ± 0.91  |
| MPI-ESM1-2-LR CMIP6e    | 1.09 ± 1.47  | 0.59 ± 0.42  | 0.5 ± 1.46   | 0.45 ± 1.15  |
| MPI-ESM1-2-LR CMIP6c    | 0.89 ± 1.06  | 0.44 ± 0.52  | 0.45 ± 1.03  | 0.42 ± 0.82  |
| MRI-ESM2-0 CMIP6e       | 1.33 ± 1.42  | 1.42 ± 0.65  | -0.09 ± 1.3  | -0.16 ± 1.25 |
| MRI-ESM2-0 CMIP6c       | 1.54 ± 1.21  | 1.56 ± 0.72  | -0.02 ± 1.16 | -0.05 ± 1.05 |
| NorESM2-LM CMIP6e       | 1.08 ± 0.66  | 0.53 ± 0.37  | 0.55 ± 0.39  | 0.52 ± 0.36  |
| NorESM2-LM CMIP6c       | 0.94 ± 0.53  | 0.44 ± 0.3   | 0.5 ± 0.39   | 0.46 ± 0.39  |
| NorESM2-MM CMIP6c       | 1.07 ± 0.69  | 0.58 ± 0.25  | 0.49 ± 0.5   | 0.44 ± 0.44  |
| SAM0-UNICON CMIP6c      | 0.06 ± 1.02  | -0.01 ± 0.58 | 0.07 ± 1.14  | 0.09 ± 0.97  |
| TaiESM1 CMIP6c          | -0.11 ± 0.8  | 0.13 ± 0.45  | -0.24 ± 0.83 | -0.19 ± 0.4  |
| UKESM1-0-LL CMIP6e      | 1.0 ± 1.06   | 0.63 ± 0.38  | 0.38 ± 1.18  | 0.3 ± 0.96   |
| UKESM1-0-LL CMIP6c      | 0.63 ± 1.01  | 0.37 ± 0.29  | 0.26 ± 1.1   | 0.22 ± 0.93  |
| CAMS                    | 1.72 ± 0.98  | 1.86 ± 0.47  | -0.14 ± 0.74 | -0.47 ± 0.59 |
| Jena_CarboScope         | 0.71 ± 0.94  | 1.25 ± 0.36  | -0.54 ± 0.72 | -0.24 ± 0.62 |
| GCP                     | 1.0 ± 0.84   | NaN          | NaN          | NaN          |
| Ncycle MMM CMIP5e       | -0.09 ± 0.59 | 0.02 ± 0.36  | -0.12 ± 0.45 | -0.1 ± 0.41  |
| non-Ncycle MMM CMIP5e   | 1.0 ± 0.68   | 0.71 ± 0.3   | 0.29 ± 0.76  | 0.22 ± 0.59  |
| Ncycle MMM CMIP5c       | -0.11 ± 0.48 | -0.01 ± 0.29 | -0.1 ± 0.43  | -0.09 ± 0.34 |
| non-Ncycle MMM CMIP5c   | 1.14 ± 0.66  | 0.67 ± 0.29  | 0.47 ± 0.52  | 0.37 ± 0.43  |
| Ncycle MMM CMIP6c       | 0.84 ± 0.34  | 0.48 ± 0.16  | 0.37 ± 0.28  | 0.34 ± 0.22  |
| non-Ncycle MMM CMIP6c   | 1.56 ± 0.62  | 0.81 ± 0.25  | 0.76 ± 0.47  | 0.66 ± 0.39  |
| Ncycle MMM CMIP6e       | 1.22 ± 0.57  | 0.79 ± 0.24  | 0.43 ± 0.54  | 0.38 ± 0.42  |
| non-Ncycle MMM CMIP6e   | 0.92 ± 0.48  | 0.68 ± 0.27  | 0.24 ± 0.39  | 0.2 ± 0.36   |

Table S6: NBP Trend for 1986-2005 [PgC yr<sup>-2</sup>]

| Model             | Global           | NH               | SH               | Tropics          |
|-------------------|------------------|------------------|------------------|------------------|
| BNU-ESM CMIP5e    | 0.0343 ± 0.0358  | 0.0217 ± 0.0269  | 0.0127 ± 0.0373  | -0.0003 ± 0.0385 |
| BNU-ESM CMIP5c    | -0.0049 ± 0.0457 | -0.0067 ± 0.0235 | 0.0018 ± 0.0415  | 0.0087 ± 0.0396  |
| CESM1-BGC CMIP5e  | 0.0468 ± 0.037   | 0.0331 ± 0.0192  | 0.0137 ± 0.0256  | 0.0117 ± 0.0219  |
| CESM1-BGC CMIP5c  | 0.0251 ± 0.0259  | 0.0255 ± 0.0131  | -0.0003 ± 0.024  | 0.0037 ± 0.0164  |
| CanESM2 CMIP5e    | -0.0427 ± 0.0979 | 0.0048 ± 0.0216  | -0.0475 ± 0.1028 | -0.0404 ± 0.0767 |
| CanESM2 CMIP5c    | -0.0579 ± 0.0815 | -0.0105 ± 0.0135 | -0.0473 ± 0.0746 | -0.0264 ± 0.0555 |
| FIO-ESM CMIP5e    | 0.0323 ± 0.0243  | 0.0128 ± 0.006   | 0.0195 ± 0.024   | 0.0218 ± 0.0242  |
| GFDL-ESM2G CMIP5e | 0.0966 ± 0.1154  | 0.0597 ± 0.0276  | 0.037 ± 0.1126   | 0.0378 ± 0.0796  |
| GFDL-ESM2G CMIP5c | 0.0726 ± 0.0845  | 0.0578 ± 0.0332  | 0.0148 ± 0.074   | 0.0319 ± 0.0514  |
| GFDL-ESM2M CMIP5e | -0.0084 ± 0.1195 | 0.0012 ± 0.0434  | -0.0096 ± 0.1412 | -0.0308 ± 0.1091 |

Continued on next page

Table S6: NBP Trend for 1986-2005 [ $\text{PgC yr}^{-2}$ ]

| Model                  | Global           | NH               | SH               | Tropics          |
|------------------------|------------------|------------------|------------------|------------------|
| GFDL-ESM2M CMIP5c      | 0.0941 ± 0.1543  | 0.0595 ± 0.0349  | 0.0347 ± 0.1607  | 0.047 ± 0.1277   |
| HadGEM2-CC CMIP5c      | 0.1189 ± 0.0439  | 0.0694 ± 0.0214  | 0.0495 ± 0.0411  | 0.034 ± 0.0405   |
| HadGEM2-ES CMIP5c      | 0.1342 ± 0.0374  | 0.0448 ± 0.0118  | 0.0893 ± 0.0422  | 0.0667 ± 0.0411  |
| IPSL-CM5A-LR CMIP5c    | 0.0674 ± 0.0435  | 0.0511 ± 0.0209  | 0.0162 ± 0.0424  | 0.0205 ± 0.0391  |
| IPSL-CM5A-MR CMIP5c    | 0.0369 ± 0.0575  | 0.0219 ± 0.0302  | 0.0151 ± 0.0503  | 0.0138 ± 0.0446  |
| IPSL-CM5B-LR CMIP5c    | 0.0204 ± 0.0518  | 0.0379 ± 0.0169  | -0.0175 ± 0.0527 | -0.0116 ± 0.0484 |
| MIROC-ESM-CHEM CMIP5c  | 0.0672 ± 0.054   | 0.0082 ± 0.0201  | 0.0591 ± 0.0484  | 0.0493 ± 0.0424  |
| MIROC-ESM CMIP5e       | 0.1939 ± 0.0477  | 0.0203 ± 0.0229  | 0.1736 ± 0.0453  | 0.1644 ± 0.035   |
| MIROC-ESM CMIP5c       | 0.105 ± 0.0553   | 0.0004 ± 0.0242  | 0.1046 ± 0.0487  | 0.0925 ± 0.0364  |
| MPI-ESM-LR CMIP5e      | 0.0116 ± 0.046   | 0.0065 ± 0.0275  | 0.0051 ± 0.0372  | 0.0074 ± 0.0179  |
| MPI-ESM-LR CMIP5c      | 0.0878 ± 0.0655  | 0.0575 ± 0.0218  | 0.0303 ± 0.0551  | 0.033 ± 0.0296   |
| MPI-ESM-MR CMIP5c      | 0.0474 ± 0.0487  | 0.0335 ± 0.0236  | 0.0139 ± 0.0402  | 0.0119 ± 0.0254  |
| MRI-ESM1 CMIP5e        | -0.0085 ± 0.0391 | -0.0036 ± 0.0215 | -0.0049 ± 0.0318 | -0.0103 ± 0.0294 |
| NorESM1-ME CMIP5e      | 0.0399 ± 0.0198  | 0.0158 ± 0.0162  | 0.024 ± 0.0211   | 0.0238 ± 0.0172  |
| NorESM1-ME CMIP5c      | 0.0213 ± 0.033   | 0.0286 ± 0.0132  | -0.0073 ± 0.0282 | -0.0087 ± 0.0232 |
| inmcm4 CMIP5c          | 0.0176 ± 0.0457  | 0.0135 ± 0.0198  | 0.0042 ± 0.0427  | -0.0169 ± 0.0384 |
| ACCESS-ESM1-5 CMIP6e   | -0.0457 ± 0.0266 | 0.0185 ± 0.0129  | -0.0642 ± 0.0257 | -0.0521 ± 0.0222 |
| ACCESS-ESM1-5 CMIP6c   | -0.11 ± 0.0366   | -0.0195 ± 0.0115 | -0.0906 ± 0.0323 | -0.0735 ± 0.0288 |
| CESM2-WACCM CMIP6c     | 0.0307 ± 0.0202  | 0.0203 ± 0.0127  | 0.0105 ± 0.0137  | 0.011 ± 0.0088   |
| CESM2 CMIP6c           | 0.0631 ± 0.0179  | 0.0302 ± 0.0104  | 0.0329 ± 0.0141  | 0.0292 ± 0.0122  |
| CMCC-CM2-SR5 CMIP6c    | 0.0156 ± 0.0447  | -0.0046 ± 0.0233 | 0.0202 ± 0.0351  | 0.0145 ± 0.0213  |
| CMCC-ESM2 CMIP6c       | 0.0217 ± 0.0246  | 0.011 ± 0.0206   | 0.0107 ± 0.0226  | 0.0091 ± 0.0137  |
| CNRM-ESM2-1 CMIP6e     | -0.0198 ± 0.0405 | 0.0175 ± 0.0174  | -0.0373 ± 0.0315 | -0.0247 ± 0.0201 |
| CNRM-ESM2-1 CMIP6c     | 0.0343 ± 0.0263  | 0.0406 ± 0.0189  | -0.0064 ± 0.0259 | -0.0063 ± 0.0175 |
| CanESM5-CanOE CMIP6e   | 0.0559 ± 0.0568  | 0.0509 ± 0.0162  | 0.005 ± 0.046    | 0.01 ± 0.0399    |
| CanESM5-CanOE CMIP6c   | 0.0923 ± 0.0712  | 0.0572 ± 0.0159  | 0.0352 ± 0.0608  | 0.0353 ± 0.0535  |
| CanESM5 CMIP6e         | -0.0218 ± 0.0512 | 0.0109 ± 0.0124  | -0.0327 ± 0.0439 | -0.0484 ± 0.0362 |
| CanESM5 CMIP6c         | -0.0028 ± 0.0273 | 0.0117 ± 0.0127  | -0.0145 ± 0.0198 | -0.0122 ± 0.0184 |
| EC-Earth3-CC CMIP6e    | 0.0115 ± 0.0703  | 0.033 ± 0.0332   | -0.0216 ± 0.0587 | -0.0121 ± 0.0406 |
| EC-Earth3-CC CMIP6c    | 0.0138 ± 0.0715  | -0.0066 ± 0.0397 | 0.0205 ± 0.0686  | 0.0151 ± 0.0539  |
| EC-Earth3-Veg CMIP6c   | -0.0126 ± 0.0672 | 0.0324 ± 0.0306  | -0.045 ± 0.0533  | -0.0237 ± 0.0444 |
| GFDL-ESM4 CMIP6e       | 0.0603 ± 0.0492  | 0.0292 ± 0.0119  | 0.0311 ± 0.0442  | 0.0304 ± 0.0409  |
| GFDL-ESM4 CMIP6c       | -0.0066 ± 0.0649 | 0.0197 ± 0.0143  | -0.0263 ± 0.057  | -0.0383 ± 0.045  |
| INM-CM4-8 CMIP6c       | 0.0267 ± 0.088   | 0.004 ± 0.0298   | 0.0228 ± 0.0611  | 0.0229 ± 0.0487  |
| INM-CM5-0 CMIP6c       | -0.0705 ± 0.0801 | -0.002 ± 0.034   | -0.0685 ± 0.0519 | -0.0462 ± 0.0462 |
| IPSL-CM6A-LR CMIP6c    | 0.0542 ± 0.0255  | 0.0158 ± 0.0077  | 0.0384 ± 0.0269  | 0.0305 ± 0.0217  |
| MIROC-ES2L CMIP6e      | 0.0081 ± 0.0253  | 0.0155 ± 0.0131  | -0.0074 ± 0.0208 | -0.0078 ± 0.0165 |
| MIROC-ES2L CMIP6c      | -0.0516 ± 0.0477 | -0.0141 ± 0.0156 | -0.0375 ± 0.0402 | -0.0319 ± 0.037  |
| MPI-ESM-1-2-HAM CMIP6c | 0.0718 ± 0.0496  | 0.021 ± 0.0152   | 0.0508 ± 0.0459  | 0.0473 ± 0.0344  |
| MPI-ESM1-2-LR CMIP6e   | 0.0644 ± 0.0565  | 0.0436 ± 0.0134  | 0.0208 ± 0.0578  | 0.0212 ± 0.0456  |
| MPI-ESM1-2-LR CMIP6c   | 0.0487 ± 0.0407  | 0.0327 ± 0.0191  | 0.016 ± 0.041    | 0.0279 ± 0.0319  |
| MRI-ESM2-0 CMIP6e      | 0.0356 ± 0.0561  | 0.0595 ± 0.0215  | -0.0239 ± 0.0514 | -0.0229 ± 0.0494 |
| MRI-ESM2-0 CMIP6c      | 0.0425 ± 0.0473  | 0.0975 ± 0.0169  | -0.055 ± 0.0444  | -0.0489 ± 0.0404 |

Continued on next page

Table S6: NBP Trend for 1986-2005 [ $\text{PgC yr}^{-2}$ ]

| Model                 | Global               | NH                  | SH                   | Tropics              |
|-----------------------|----------------------|---------------------|----------------------|----------------------|
| NorESM2-LM CMIP6e     | $0.0472 \pm 0.024$   | $0.0205 \pm 0.0141$ | $0.0266 \pm 0.0141$  | $0.0249 \pm 0.0129$  |
| NorESM2-LM CMIP6c     | $0.0367 \pm 0.0191$  | $0.0206 \pm 0.0111$ | $0.0161 \pm 0.0151$  | $0.0157 \pm 0.0152$  |
| NorESM2-MM CMIP6c     | $0.0179 \pm 0.0273$  | $0.0103 \pm 0.0098$ | $0.0076 \pm 0.0198$  | $0.0052 \pm 0.0174$  |
| SAM0-UNICON CMIP6c    | $0.0417 \pm 0.0394$  | $0.0177 \pm 0.0226$ | $0.024 \pm 0.0452$   | $0.0219 \pm 0.0383$  |
| TaiESM1 CMIP6c        | $-0.0034 \pm 0.032$  | $0.0129 \pm 0.0176$ | $-0.0162 \pm 0.0327$ | $-0.0092 \pm 0.0159$ |
| UKESM1-0-LL CMIP6e    | $0.0335 \pm 0.042$   | $0.0409 \pm 0.0122$ | $-0.0074 \pm 0.0475$ | $-0.0034 \pm 0.039$  |
| UKESM1-0-LL CMIP6c    | $-0.0341 \pm 0.0399$ | $0.0193 \pm 0.011$  | $-0.0534 \pm 0.0425$ | $-0.0504 \pm 0.0356$ |
| CAMS                  | $0.0545 \pm 0.037$   | $0.0238 \pm 0.0178$ | $0.0307 \pm 0.0285$  | $0.0186 \pm 0.0232$  |
| Jena_CarboScope       | $0.0006 \pm 0.0374$  | $0.0085 \pm 0.0143$ | $-0.0079 \pm 0.0287$ | $-0.0038 \pm 0.0246$ |
| GCP                   | $0.0255 \pm 0.033$   | NaN                 | NaN                  | NaN                  |
| Ncycle MMM CMIP5e     | $0.0433 \pm 0.0213$  | $0.0245 \pm 0.0133$ | $0.0189 \pm 0.0175$  | $0.0177 \pm 0.0158$  |
| non-Ncycle MMM CMIP5e | $0.0164 \pm 0.027$   | $0.0147 \pm 0.0113$ | $0.0017 \pm 0.0304$  | $-0.0021 \pm 0.0236$ |
| Ncycle MMM CMIP5c     | $0.0232 \pm 0.0185$  | $0.0271 \pm 0.0094$ | $-0.0038 \pm 0.0171$ | $-0.0025 \pm 0.0136$ |
| non-Ncycle MMM CMIP5c | $0.0526 \pm 0.0232$  | $0.0357 \pm 0.0082$ | $0.0169 \pm 0.0204$  | $0.0176 \pm 0.0167$  |
| Ncycle MMM CMIP6c     | $0.0064 \pm 0.0133$  | $0.0114 \pm 0.0057$ | $-0.0049 \pm 0.0109$ | $-0.0025 \pm 0.0086$ |
| non-Ncycle MMM CMIP6c | $0.0269 \pm 0.024$   | $0.0295 \pm 0.007$  | $-0.0026 \pm 0.0187$ | $-0.0018 \pm 0.0155$ |
| Ncycle MMM CMIP6e     | $0.0214 \pm 0.022$   | $0.0277 \pm 0.0068$ | $-0.0063 \pm 0.0216$ | $-0.0034 \pm 0.0168$ |
| non-Ncycle MMM CMIP6e | $0.022 \pm 0.0184$   | $0.0336 \pm 0.0076$ | $-0.0116 \pm 0.0153$ | $-0.0111 \pm 0.014$  |

Table S7: Carbon Storage Totals [ $\text{PgC}$ ]

|                       | cVeg | cSoil + cLitter |
|-----------------------|------|-----------------|
| BNU-ESM CMIP5e        | 1205 | 856             |
| BNU-ESM CMIP5c        | 1259 | 913             |
| CESM1-BGC CMIP5e      | 538  | 515             |
| CESM1-BGC CMIP5c      | 532  | 513             |
| GFDL-ESM2G CMIP5e     | 680  | 1434            |
| GFDL-ESM2G CMIP5c     | 660  | 1422            |
| GFDL-ESM2M CMIP5e     | 802  | 1292            |
| GFDL-ESM2M CMIP5c     | 766  | 1279            |
| HadGEM2-CC CMIP5c     | 445  | 1103            |
| HadGEM2-ES CMIP5c     | 458  | 1109            |
| IPSL-CM5A-LR CMIP5c   | 634  | 1355            |
| IPSL-CM5A-MR CMIP5c   | 639  | 1400            |
| IPSL-CM5B-LR CMIP5c   | 501  | 1267            |
| MIROC-ESM-CHEM CMIP5c | 351  | 2567            |
| MIROC-ESM CMIP5e      | 364  | 2564            |
| MIROC-ESM CMIP5c      | 357  | 2572            |
| MPI-ESM-LR CMIP5e     | 341  | 3039            |
| MPI-ESM-LR CMIP5c     | 335  | 3036            |
| MPI-ESM-MR CMIP5c     | 345  | 3092            |
| MRI-ESM1 CMIP5e       | 562  | 1419            |

Continued on next page

Table S7: Carbon Storage Totals [PgC]

|                        | cVeg | cSoil + cLitter |
|------------------------|------|-----------------|
| NorESM1-ME CMIP5e      | 556  | 552             |
| NorESM1-ME CMIP5c      | 554  | 550             |
| ACCESS-ESM1-5 CMIP6e   | 653  | 904             |
| ACCESS-ESM1-5 CMIP6c   | 661  | 914             |
| CESM2-WACCM CMIP6c     | 574  | 1201            |
| CESM2 CMIP6c           | 482  | 1000            |
| CMCC-CM2-SR5 CMIP6c    | 406  | 2908            |
| CMCC-ESM2 CMIP6c       | 416  | 2913            |
| CNRM-ESM2-1 CMIP6e     | 724  | 2279            |
| CNRM-ESM2-1 CMIP6c     | 719  | 2281            |
| CanESM5-CanOE CMIP6e   | 508  | 1475            |
| CanESM5 CMIP6e         | 507  | 1470            |
| CanESM5 CMIP6c         | 513  | 1486            |
| EC-Earth3-CC CMIP6e    | 395  | 1546            |
| EC-Earth3-CC CMIP6c    | 382  | 1535            |
| EC-Earth3-Veg CMIP6c   | 333  | 1367            |
| GFDL-ESM4 CMIP6c       | 342  | 514             |
| IPSL-CM6A-LR CMIP6c    | 352  | 649             |
| MIROC-ES2L CMIP6e      | 512  | 1417            |
| MIROC-ES2L CMIP6c      | 531  | 1481            |
| MPI-ESM-1-2-HAM CMIP6c | 382  | 1030            |
| MPI-ESM1-2-LR CMIP6e   | 370  | 977             |
| MPI-ESM1-2-LR CMIP6c   | 367  | 980             |
| MRI-ESM2-0 CMIP6e      | 478  | 1062            |
| MRI-ESM2-0 CMIP6c      | 485  | 1224            |
| NorESM2-LM CMIP6e      | 484  | 1014            |
| NorESM2-LM CMIP6c      | 466  | 950             |
| NorESM2-MM CMIP6c      | 471  | 898             |
| SAM0-UNICON CMIP6c     | 590  | 577             |
| TaiESM1 CMIP6c         | 498  | 525             |
| UKESM1-0-LL CMIP6e     | 711  | 2100            |
| UKESM1-0-LL CMIP6c     | 705  | 2118            |
| OBS OBS historical     | 478  | 1561            |
| Ncycle_mmm CMIP5e      | 547  | 534             |
| non-Ncycle_mmm CMIP5e  | 521  | 2040            |
| Ncycle_mmm CMIP5c      | 543  | 532             |
| non-Ncycle_mmm CMIP5c  | 488  | 1920            |
| Ncycle_mmm CMIP6c      | 485  | 1380            |
| non-Ncycle_mmm CMIP6c  | 465  | 1197            |
| Ncycle_mmm CMIP6e      | 510  | 1281            |
| non-Ncycle_mmm CMIP6e  | 561  | 1618            |
